# Supplementary material for: Computational identification of miRNAs that modulate the differentiation of mesenchymal stem cells to osteoblasts
Source: PeerJ. 2016 Apr 26;4:e1976. doi: 10.7717/peerj.1976 (PMC4860310; doi:10.7717/peerj.1976)
Supplement: Table S1 [file peerj-04-1976-s001.xlsx]

## Sheet: 3'UTR Runx2
The human 3’ untranslated region (3’UTR) sequence of Runx2 (Accession number NM_001024630)	aatt cctcagcagt ggcccagtgg tatctggggg ccacatccca cacgtatcaa tatatacata tatagagaga gtgcatatat atgtatatcg attagctatc tacaaagtgc ctatttttta gaagattttt cattcactca ctcagtcatg atcttgcagc cataagaggg tagatattga gaagcagaag gctcaagaga gacaattgca atcgagcttc agattgttta ctatttaaga tgtactttta caaaggaaca aagaagggaa aaggtatttt tgtttttgtt gtttggtctg ttatcatcaa taacctgttc atatgccaat tcagagaggt ggactccagg ttcaggagg…
